# Supplementary material for: Placental circadian lincRNAs and spontaneous preterm birth
Source: Frontiers journal article supplement (doi:10.3389/fgene.2022.1051396), 2023-01-11
Supplement: Data_Sheet_1.pdf [file Data_Sheet_1.pdf]

**A**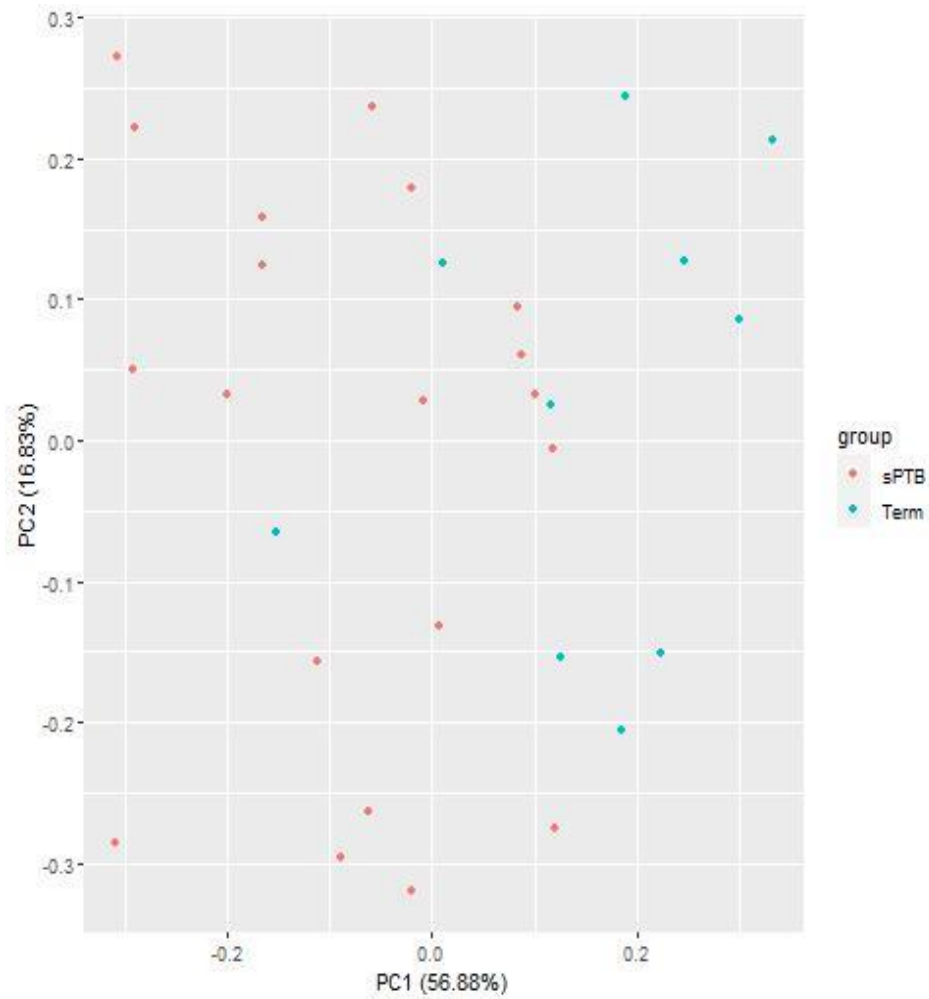**B**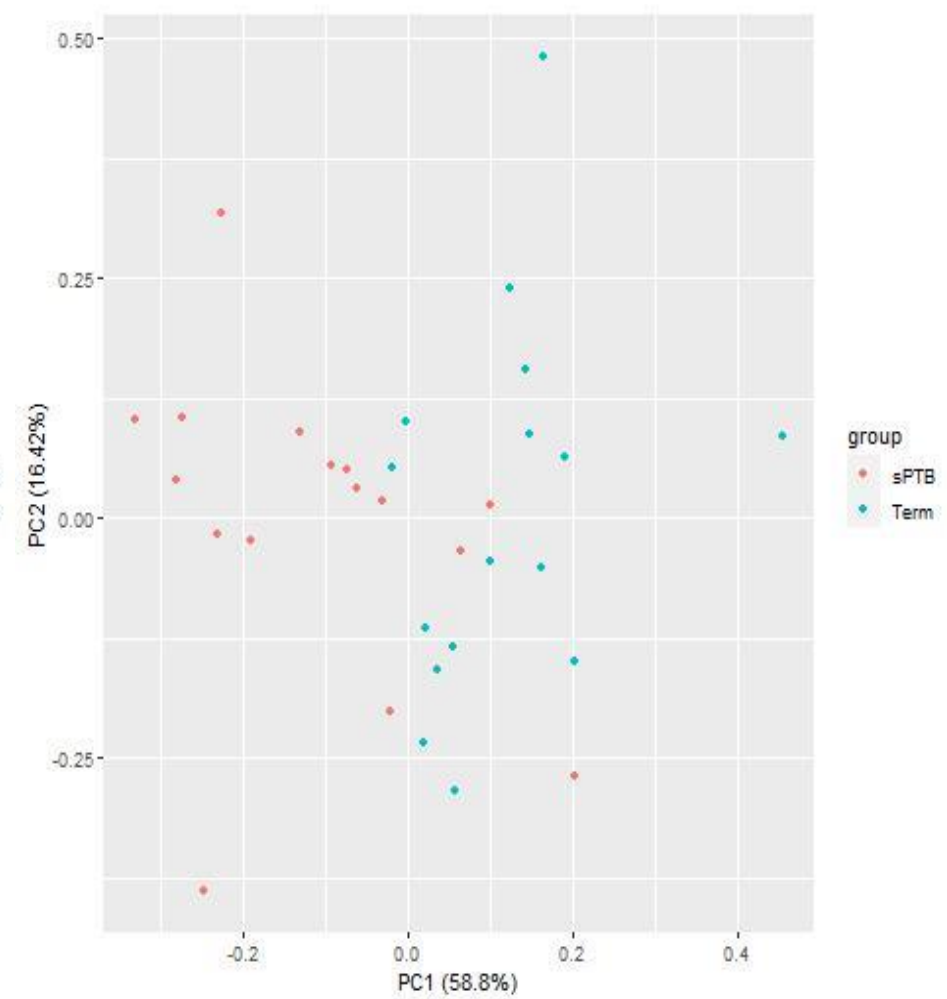

Figure S1. PCA analysis of 5 circadian lincRNAs to visualize the clusters due to the differences in 5 circadian lincRNAs between sPTB and term births and the corresponding variability. A is for GSE73712 and B for GSE174415.
