# Supplementary material for: Placental circadian lincRNAs and spontaneous preterm birth
Source: Front Genet. 2023 Jan 11;13:1051396. doi: 10.3389/fgene.2022.1051396 (PMC9874002; doi:10.3389/fgene.2022.1051396)
Supplement: Supplementary file 1 [file Table2.xlsx]

## Sheet: GSE73712_65paths_gsva
pathway_name	logFC	AveExpr	t	P_Value	adj_P_Val	B
REACTOME_REGULATION_OF_GENE_EXPRESSION_IN_LATE_STAGE_BRANCHING_MORPHOGENESIS_PANCREATIC_BUD_PRECURSOR_CELLS	-0.309442	0.00633339	-2.60419	0.0132141	0.124048	-3.0069
REACTOME_RUNX3_REGULATES_NOTCH_SIGNALING	-0.274513	0.00285098	-2.46234	0.0186229	0.147737	-3.29867
REACTOME_NOTCH4_INTRACELLULAR_DOMAIN_REGULATES_TRANSCRIPTION	-0.243899	0.00523176	-2.24377	0.0309672	0.18959	-3.72554
REACTOME_TRAF6_MEDIATED_IRF7_ACTIVATION	-0.217976	0.0116174	-2.6825	0.0108883	0.115714	-2.84115
PID_BMP_PATHWAY	-0.177761	0.0110802	-2.35838	0.0237932	0.165578	-3.50525
WP_METAPATHWAY_BIOTRANSFORMATION_PHASE_I_AND_II	0.130186	-0.00147385	2.14364	0.0387556	0.210263	-3.91129
REACTOME_G_PROTEIN_BETA_GAMMA_SIGNALLING	0.153873	-0.0130679	2.15413	0.0378649	0.206561	-3.89212
WP_COMMON_PATHWAYS_UNDERLYING_DRUG_ADDICTION	0.161522	0.0103166	2.04981	0.047578	0.236108	-4.07946
REACTOME_CYCLIN_D_ASSOCIATED_EVENTS_IN_G1	0.166178	-0.0135466	2.07578	0.0449747	0.227193	-4.03348
REACTOME_CELLULAR_RESPONSE_TO_CHEMICAL_STRESS	0.170869	-0.00407179	2.48113	0.0178058	0.145666	-3.26068
KEGG_RENIN_ANGIOTENSIN_SYSTEM	0.174234	-0.030954	2.05709	0.0468351	0.23489	-4.06661
REACTOME_CILIUM_ASSEMBLY	0.176916	-0.0088402	2.26079	0.029792	0.184908	-3.69333
KEGG_PYRIMIDINE_METABOLISM	0.180473	-0.0112839	2.19522	0.0345501	0.19807	-3.8164
REACTOME_ADP_SIGNALLING_THROUGH_P2Y_PURINOCEPTOR_12	0.187534	-0.00866885	2.12077	0.0407613	0.214108	-3.95281
KEGG_BUTANOATE_METABOLISM	0.201968	-0.0148636	2.22319	0.032443	0.192492	-3.76423
REACTOME_G_BETA_GAMMA_SIGNALLING_THROUGH_PI3KGAMMA	0.202571	-0.0128342	2.31181	0.0265052	0.175636	-3.59574
BIOCARTA_TFF_PATHWAY	0.203001	-0.0216922	2.10663	0.0420462	0.218972	-3.97831
REACTOME_DISEASES_OF_CARBOHYDRATE_METABOLISM	0.207472	-0.0244178	2.35806	0.0238114	0.165578	-3.5059
REACTOME_G_PROTEIN_ACTIVATION	0.208755	-0.0100663	2.28336	0.0282952	0.179341	-3.65035
REACTOME_ANTIGEN_PROCESSING_CROSS_PRESENTATION	0.216151	-0.0126005	2.55668	0.0148396	0.133734	-3.10585
REACTOME_INFECTION_WITH_MYCOBACTERIUM_TUBERCULOSIS	0.216373	-0.0138482	3.30252	0.00214264	0.0618895	-1.4265
REACTOME_PROTEIN_FOLDING	0.216981	-0.00623969	3.62517	0.000870081	0.0455187	-0.630595
REACTOME_THROMBOXANE_SIGNALLING_THROUGH_TP_RECEPTOR	0.21887	-0.0180481	2.74293	0.00935924	0.109062	-2.71109
REACTOME_ACYL_CHAIN_REMODELLING_OF_PG	0.219613	-0.0251625	2.19769	0.034359	0.197477	-3.81181
WP_ONECARBON_METABOLISM	0.22121	-0.0120954	3.02249	0.00455126	0.0748405	-2.08635
KEGG_GLYCINE_SERINE_AND_THREONINE_METABOLISM	0.221643	-0.00270446	3.5891	0.000963827	0.0462022	-0.721245
KEGG_ALZHEIMERS_DISEASE	0.224012	-0.00834975	3.08898	0.00381598	0.071645	-1.93258
REACTOME_SYNTHESIS_OF_VERY_LONG_CHAIN_FATTY_ACYL_COAS	0.227071	-0.0184093	2.46638	0.0184445	0.14736	-3.29052
REACTOME_GLUCAGON_TYPE_LIGAND_RECEPTORS	0.237962	-0.00487053	2.62529	0.0125462	0.121052	-2.96257
REACTOME_METABOLISM_OF_AMINO_ACIDS_AND_DERIVATIVES	0.241211	0.00136951	3.15655	0.0031848	0.0676399	-1.77441
KEGG_BETA_ALANINE_METABOLISM	0.241333	-0.00243281	2.4242	0.0203875	0.156768	-3.37519
REACTOME_LDL_CLEARANCE	0.244009	-0.011723	2.7315	0.00963216	0.110239	-2.73583
WP_RALA_DOWNSTREAM_REGULATED_GENES	0.24439	-0.0236264	2.69112	0.0106569	0.115433	-2.82271
REACTOME_ADP_SIGNALLING_THROUGH_P2Y_PURINOCEPTOR_1	0.244938	-0.000208932	2.88402	0.00653162	0.085062	-2.40036
WP_ONECARBON_METABOLISM_AND_RELATED_PATHWAYS	0.247275	-0.0206202	3.63098	0.000855833	0.0455187	-0.615963
REACTOME_SIGNALING_BY_ROBO_RECEPTORS	0.250221	0.00090267	3.00527	0.00476242	0.0751444	-2.12587
REACTOME_GLUTATHIONE_CONJUGATION	0.251702	-0.00204142	3.52682	0.00114908	0.0471737	-0.876838
KEGG_CARDIAC_MUSCLE_CONTRACTION	0.25171	-0.0103791	3.21179	0.00274364	0.0676399	-1.64371
REACTOME_CHK1_CHK2_CDS1_MEDIATED_INACTIVATION_OF_CYCLIN_B_CDK1_COMPLEX	0.253264	-0.027124	2.10517	0.0421811	0.218972	-3.98094
REACTOME_GLUTAMATE_AND_GLUTAMINE_METABOLISM	0.255809	-0.0130503	2.41918	0.0206311	0.157033	-3.38521
REACTOME_TP53_REGULATES_METABOLIC_GENES	0.257747	-0.00585259	4.11576	0.000209246	0.0336736	0.636958
REACTOME_GLYCOGEN_SYNTHESIS	0.258203	-0.0143663	2.28515	0.0281796	0.179341	-3.64693
WP_PURINE_METABOLISM_AND_RELATED_DISORDERS	0.261961	-0.0392733	2.79958	0.00810901	0.100094	-2.58748
REACTOME_NEF_MEDIATES_DOWN_MODULATION_OF_CELL_SURFACE_RECEPTORS_BY_RECRUITING_THEM_TO_CLATHRIN_ADAPTERS	0.264875	-0.00610374	2.65612	0.0116257	0.11906	-2.89734
REACTOME_COOPERATION_OF_PDCL_PHLP1_AND_TRIC_CCT_IN_G_PROTEIN_BETA_FOLDING	0.269291	-0.0104046	3.68536	0.00073291	0.0444993	-0.478474
REACTOME_CREATION_OF_C4_AND_C2_ACTIVATORS	0.275535	-0.0395998	2.05527	0.0470196	0.23489	-4.06982
BIOCARTA_COMP_PATHWAY	0.277481	-0.013781	2.29317	0.0276663	0.179341	-3.63158
WP_CHOLESTEROL_METABOLISM_WITH_BLOCH_AND_KANDUTSCHRUSSELL_PATHWAYS	0.277814	-0.0097137	3.5473	0.00108468	0.0471737	-0.82581
REACTOME_GAP_JUNCTION_DEGRADATION	0.279438	-0.0111203	3.21742	0.00270215	0.0676399	-1.63034
REACTOME_COOPERATION_OF_PREFOLDIN_AND_TRIC_CCT_IN_ACTIN_AND_TUBULIN_FOLDING	0.287426	-0.0103044	2.81154	0.00786586	0.0979104	-2.56119
REACTOME_GLUCONEOGENESIS	0.299388	-0.0113557	2.96684	0.00526732	0.0751444	-2.21358
WP_AMINO_ACID_METABOLISM	0.301203	-0.00219683	3.68547	0.000732679	0.0444993	-0.478195
WP_NANOPARTICLE_TRIGGERED_REGULATED_NECROSIS	0.305058	0.0164658	2.89749	0.00630829	0.0831145	-2.3702
KEGG_PROPANOATE_METABOLISM	0.305358	0.000698461	3.48936	0.00127651	0.0487453	-0.969817
REACTOME_THE_ROLE_OF_NEF_IN_HIV_1_REPLICATION_AND_DISEASE_PATHOGENESIS	0.329247	-0.00240516	3.67704	0.000750542	0.0444993	-0.499563
BIOCARTA_EIF4_PATHWAY	0.335862	-0.0127349	4.30934	0.000117548	0.0312909	1.1517
KEGG_STEROID_BIOSYNTHESIS	0.340395	-0.0213978	3.13081	0.00341255	0.0692655	-1.83487
REACTOME_METABOLISM_OF_FOLATE_AND_PTERINES	0.343877	-0.0252963	3.03702	0.00438004	0.0748405	-2.05292
WP_METABOLIC_REPROGRAMMING_IN_COLON_CANCER	0.346052	-0.0165857	4.20263	0.000161674	0.0336736	0.867103
REACTOME_TRANSLATION	0.361188	-0.0045776	3.44301	0.00145306	0.0496022	-1.08424
REACTOME_PENTOSE_PHOSPHATE_PATHWAY	0.379919	-0.0183145	4.42722	8.25e-05	0.0312909	1.46829
REACTOME_WNT5A_DEPENDENT_INTERNALIZATION_OF_FZD2_FZD5_AND_ROR2	0.393463	-0.015126	3.87532	0.000423774	0.0410978	0.00825171
REACTOME_METHYLATION	0.426873	-0.00403797	3.92431	0.000367404	0.0410978	0.135282
REACTOME_FOLDING_OF_ACTIN_BY_CCT_TRIC	0.434684	-0.0226182	3.05438	0.00418336	0.0742134	-2.01284
WP_MITOCHONDRIAL_COMPLEX_III_ASSEMBLY	0.455833	0.0029756	3.91862	0.000373559	0.0410978	0.120493
