# Supplementary material for: Placental circadian lincRNAs and spontaneous preterm birth
Source: Front Genet. 2023 Jan 11;13:1051396. doi: 10.3389/fgene.2022.1051396 (PMC9874002; doi:10.3389/fgene.2022.1051396)
Supplement: Supplementary file 2 [file Table3.xlsx]

## Sheet: GSE174415_65paths_gsva
pathway_name	logFC	AveExpr	t	P_Value	adj_P_Val	B
REACTOME_REGULATION_OF_GENE_EXPRESSION_IN_LATE_STAGE_BRANCHING_MORPHOGENESIS_PANCREATIC_BUD_PRECURSOR_CELLS	-0.282406	0.0427649	-2.56241	0.014117	0.133233	-3.08314
REACTOME_RUNX3_REGULATES_NOTCH_SIGNALING	-0.275514	0.0353201	-2.63115	0.0118916	0.127593	-2.93669
REACTOME_NOTCH4_INTRACELLULAR_DOMAIN_REGULATES_TRANSCRIPTION	-0.248529	0.0500123	-2.42502	0.0197422	0.152863	-3.36751
REACTOME_TRAF6_MEDIATED_IRF7_ACTIVATION	-0.227308	0.00769299	-2.46487	0.0179308	0.146794	-3.28619
PID_BMP_PATHWAY	-0.162711	0.0208212	-2.1521	0.037255	0.199457	-3.89742
REACTOME_TP53_REGULATES_METABOLIC_GENES	0.130888	-0.009198	2.03924	0.0478274	0.217373	-4.10208
REACTOME_G_PROTEIN_BETA_GAMMA_SIGNALLING	0.157059	0.00971728	2.21636	0.0322048	0.188456	-3.77701
REACTOME_PROTEIN_FOLDING	0.158697	0.00163037	2.31868	0.0254128	0.169342	-3.57969
REACTOME_CYCLIN_D_ASSOCIATED_EVENTS_IN_G1	0.164298	-0.0120554	2.34265	0.0240199	0.165591	-3.53248
REACTOME_CILIUM_ASSEMBLY	0.169324	-0.0137818	2.28398	0.0275569	0.177195	-3.64737
WP_METAPATHWAY_BIOTRANSFORMATION_PHASE_I_AND_II	0.170994	-0.012817	2.5516	0.0144997	0.133409	-3.10592
REACTOME_INFECTION_WITH_MYCOBACTERIUM_TUBERCULOSIS	0.17133	-0.00776845	2.65882	0.0110904	0.127593	-2.87698
REACTOME_GLUCAGON_TYPE_LIGAND_RECEPTORS	0.175746	-0.00728297	2.06424	0.0452824	0.211805	-4.0575
KEGG_PYRIMIDINE_METABOLISM	0.178544	-0.0311033	2.142	0.0381092	0.19956	-3.9161
BIOCARTA_TFF_PATHWAY	0.189002	-0.013232	2.59391	0.0130536	0.131274	-3.01636
WP_ONECARBON_METABOLISM_AND_RELATED_PATHWAYS	0.190715	-0.0231933	2.87171	0.00640293	0.103846	-2.40355
REACTOME_G_BETA_GAMMA_SIGNALLING_THROUGH_PI3KGAMMA	0.200708	0.00887557	2.48875	0.0169191	0.144206	-3.237
REACTOME_THROMBOXANE_SIGNALLING_THROUGH_TP_RECEPTOR	0.202038	0.0118095	2.59257	0.0130973	0.131274	-3.01922
REACTOME_ACYL_CHAIN_REMODELLING_OF_PG	0.221563	-0.00893227	2.32488	0.0250457	0.167403	-3.56751
KEGG_ALZHEIMERS_DISEASE	0.22216	-0.0254503	2.56866	0.0138999	0.13232	-3.06994
KEGG_CARDIAC_MUSCLE_CONTRACTION	0.231395	-0.0210779	2.50054	0.0164389	0.142319	-3.21259
REACTOME_DISEASES_OF_CARBOHYDRATE_METABOLISM	0.231574	0.00907752	2.40492	0.0207174	0.155378	-3.40816
REACTOME_GLYCOGEN_SYNTHESIS	0.232813	-0.019894	2.32981	0.0247571	0.166997	-3.55781
REACTOME_SIGNALING_BY_ROBO_RECEPTORS	0.234107	-0.0351296	2.3131	0.0257471	0.169903	-3.59062
REACTOME_COOPERATION_OF_PDCL_PHLP1_AND_TRIC_CCT_IN_G_PROTEIN_BETA_FOLDING	0.235432	0.00393325	3.00557	0.00448333	0.0957169	-2.09384
WP_NANOPARTICLE_TRIGGERED_REGULATED_NECROSIS	0.236312	-0.0126617	3.01694	0.00434813	0.0946688	-2.06716
REACTOME_G_PROTEIN_ACTIVATION	0.2364	-0.00281126	2.8368	0.00701712	0.103846	-2.48284
REACTOME_COOPERATION_OF_PREFOLDIN_AND_TRIC_CCT_IN_ACTIN_AND_TUBULIN_FOLDING	0.240153	-0.0122989	2.29066	0.0271317	0.176713	-3.63439
REACTOME_GLUCONEOGENESIS	0.241001	-0.000965893	2.27083	0.0284108	0.180044	-3.67281
REACTOME_TRANSLATION	0.241861	-0.0503939	2.07167	0.0445498	0.210717	-4.04417
WP_METABOLIC_REPROGRAMMING_IN_COLON_CANCER	0.248676	-0.00118904	2.76548	0.00844546	0.113933	-2.64282
KEGG_RENIN_ANGIOTENSIN_SYSTEM	0.250891	0.0123506	2.50159	0.016397	0.142319	-3.21042
WP_COMMON_PATHWAYS_UNDERLYING_DRUG_ADDICTION	0.252267	0.00167189	3.05666	0.00390493	0.0923326	-1.97335
WP_ONECARBON_METABOLISM	0.257111	-0.0091757	3.34494	0.00175455	0.0587753	-1.27125
REACTOME_CELLULAR_RESPONSE_TO_CHEMICAL_STRESS	0.25832	-0.0140511	3.16838	0.00287552	0.0752771	-1.7056
REACTOME_GLUTATHIONE_CONJUGATION	0.259265	-0.00449657	2.6664	0.0108798	0.126586	-2.86055
REACTOME_CREATION_OF_C4_AND_C2_ACTIVATORS	0.263831	-0.00466082	2.10131	0.0417277	0.206394	-3.99061
REACTOME_METABOLISM_OF_FOLATE_AND_PTERINES	0.26422	-0.00816792	2.62389	0.0121104	0.129276	-2.95229
KEGG_PROPANOATE_METABOLISM	0.264689	-0.0349973	2.71757	0.00955154	0.120535	-2.74876
REACTOME_METHYLATION	0.267663	-0.0437171	2.87165	0.00640401	0.103846	-2.40369
KEGG_GLYCINE_SERINE_AND_THREONINE_METABOLISM	0.271594	-0.0183389	3.66216	0.000701484	0.0358735	-0.459872
REACTOME_METABOLISM_OF_AMINO_ACIDS_AND_DERIVATIVES	0.276092	-0.045634	2.83747	0.0070048	0.103846	-2.48132
BIOCARTA_EIF4_PATHWAY	0.277388	-0.00706005	3.41901	0.00142102	0.0516606	-1.0852
REACTOME_WNT5A_DEPENDENT_INTERNALIZATION_OF_FZD2_FZD5_AND_ROR2	0.282918	0.00100788	2.74756	0.00884446	0.116461	-2.68259
REACTOME_ADP_SIGNALLING_THROUGH_P2Y_PURINOCEPTOR_1	0.28565	-0.00264737	3.56933	0.000920682	0.0392953	-0.701143
REACTOME_ANTIGEN_PROCESSING_CROSS_PRESENTATION	0.288477	-0.0201649	3.02883	0.00421065	0.0935275	-2.03914
REACTOME_NEF_MEDIATES_DOWN_MODULATION_OF_CELL_SURFACE_RECEPTORS_BY_RECRUITING_THEM_TO_CLATHRIN_ADAPTERS	0.290275	0.0133105	3.13262	0.00317322	0.0816401	-1.79191
REACTOME_ADP_SIGNALLING_THROUGH_P2Y_PURINOCEPTOR_12	0.29303	-0.00569855	3.32345	0.00186453	0.060142	-1.32483
REACTOME_SYNTHESIS_OF_VERY_LONG_CHAIN_FATTY_ACYL_COAS	0.299505	-0.00515416	3.88991	0.000355875	0.0283531	0.144051
WP_CHOLESTEROL_METABOLISM_WITH_BLOCH_AND_KANDUTSCHRUSSELL_PATHWAYS	0.300037	-0.0157156	3.87575	0.000371381	0.0283531	0.106031
WP_RALA_DOWNSTREAM_REGULATED_GENES	0.303679	-0.0101654	2.86373	0.00653873	0.103846	-2.42173
WP_MITOCHONDRIAL_COMPLEX_III_ASSEMBLY	0.306459	-0.0425233	2.42605	0.0196934	0.152863	-3.36542
KEGG_BUTANOATE_METABOLISM	0.310865	-0.0243559	3.47237	0.00121921	0.0458482	-0.949822
REACTOME_GLUTAMATE_AND_GLUTAMINE_METABOLISM	0.311247	-0.0273408	2.94799	0.00523142	0.101261	-2.22817
REACTOME_THE_ROLE_OF_NEF_IN_HIV_1_REPLICATION_AND_DISEASE_PATHOGENESIS	0.317735	0.00233212	3.84521	0.000407067	0.029838	0.0242663
KEGG_BETA_ALANINE_METABOLISM	0.323871	-0.0259935	4.10136	0.000187034	0.0223673	0.718382
BIOCARTA_COMP_PATHWAY	0.334827	-0.000454489	3.04833	0.00399418	0.0930383	-1.99308
WP_AMINO_ACID_METABOLISM	0.340562	-0.0195236	4.44346	6.46e-05	0.0160589	1.67065
WP_PURINE_METABOLISM_AND_RELATED_DISORDERS	0.342808	-0.0316461	3.87349	0.000373915	0.0283531	0.0999698
REACTOME_FOLDING_OF_ACTIN_BY_CCT_TRIC	0.347718	0.0125862	2.50871	0.0161135	0.142304	-3.19562
REACTOME_CHK1_CHK2_CDS1_MEDIATED_INACTIVATION_OF_CYCLIN_B_CDK1_COMPLEX	0.357515	-0.00728796	3.11969	0.00328789	0.0831044	-1.82299
REACTOME_GAP_JUNCTION_DEGRADATION	0.370246	-0.00733902	4.75407	2.41e-05	0.0153312	2.55479
REACTOME_LDL_CLEARANCE	0.380922	0.00484867	4.20527	0.000135774	0.0223673	1.00486
REACTOME_PENTOSE_PHOSPHATE_PATHWAY	0.424287	-0.0465406	4.43778	6.57e-05	0.0160589	1.65465
KEGG_STEROID_BIOSYNTHESIS	0.465264	0.00465437	3.99956	0.000255308	0.025315	0.44037
