# Supplementary material for: Placental circadian lincRNAs and spontaneous preterm birth
Source: Front Genet. 2023 Jan 11;13:1051396. doi: 10.3389/fgene.2022.1051396 (PMC9874002; doi:10.3389/fgene.2022.1051396)
Supplement: Supplementary file 4 [file Table1.xlsx]

## Sheet: Sheet1
								Transcript Sequence Similarity (Percent Identity Matrix)*
Transcript Name	chromosome	Start	End	Strand	Human Genome Reference Assembly	NCBI Reference Sequence	Transcript Length	LINC00649	LINC00893	LINC00265	LINC00482	LINC01089
LINC00649	chr21	33915534	34051948	+	GRCh38/hg38	NR_03883.2	2657 bp	100	45.2	51.9	49.1	41.1
LINC00893	chrX	149483112	149540959	-	GRCh38/hg38	NR_027455.5	2367 bp	45.2	100	53.1	50.4	48.1
LINC00265	chr7	39699885	39801259	+	GRCh38/hg38	NR_026999.1	4651 bp	51.9	53.1	100	56.8	47.9
LINC00482	chr17	81299219	81309278	-	GRCh38/hg38	NR_038080.1	2970 bp	49.1	50.4	56.8	100	56
LINC01089	chr12	121779607	121803924	-	GRCh38/hg38	NR_002809.3	999 bp	41.1	48.1	47.9	56	100
